# Supplementary material for: Candida albicans Is Resistant to Polyglutamine Aggregation and Toxicity
Source: PubMed Central journal article supplement (PMC5217127; doi:10.1534/g3.116.035675), 2016-11-01
Supplement: 95TableS1.pdf [file 95TableS1.pdf]

Leach et al. *Candida albicans* is Resistant to Polyglutamine Aggregation and Toxicity

Supplemental Material

Table S1. Primers

| Number  | Gene               | Sequence                                                                                     |
|---------|--------------------|----------------------------------------------------------------------------------------------|
| oLC3001 | SalI FLAG PolyQ F  | TACGACTT <u>GTCGAC</u> ATGGACTACAAGGACGACGATGACAAGtTGGCGACCtTGGAAAAGtTGATGAAGGC              |
| oLC3035 | Linker-BamHI-RFP R | cttcttcaccttttgaaacGGATCCCCCGGGCTGCAG                                                        |
| oLC3011 | BgsIII RFP R       | GGCAAGATCTttatttatataattcatcataccacc                                                         |
| oLC3036 | RFP-Linker-BamHI F | CTGCAGCCCCGGGGGATCCgtttcaaagggtgaagaag                                                       |
| oLC3012 | TetON-PolyQ F      | CTCTTTCAACTTCTCAGAAAG                                                                        |
| oLC3013 | RFP-PolyQ R        | CTGAACCTTCCATATGAAC                                                                          |
| oLC3014 | RFP-PolyQ F        | CAATATGAAAGAGCTGAAGG                                                                         |
| oLC3015 | SAT1-PolyQ R       | CAAGATATAGAAATGCCTTGG                                                                        |
| oLC452  | CaADH1-750F        | TTCTCATATAGGTCATGTGC                                                                         |
| oLC453  | pNIM1 + 935R       | CCATTAAGCAACTCTAATGC                                                                         |
| oLC454  | pNIM1 + 5879F      | CTTGTCTGGTTACACTCACG                                                                         |
| oLC455  | CaADH1 + 2212R     | TTGCTTATCAACTGGTGTCC                                                                         |
| oLC3967 | CaHSP104 F pLC49   | TCATTTCTCTTTTTTCTTTTTTTTTTCAACTTCAATTCATTATTAATAACAATTATACA<br>CTATTAGATCGGAAACAGCTATGACCATG |
| oLC3968 | CaHSP104 R pLC49   | TTATTTTTTAAAACTATATAAACTGTACAAAATATTAGATTTTTATTTATGTGTAAT<br>GTACTTTTAGTGTAACGACGGCCAG       |
| oLC275  | pJK863up-R         | AAAGTCAAAGTTCCAAGGGG                                                                         |
| oLC3021 | CaHSP104 -164F     | GAGTCGCAAACATTGTATG                                                                          |
| oLC274  | pJK863down-F       | CTGTCAAGGAGGGTATTCTGG                                                                        |

|         |                            |                                                                                               |
|---------|----------------------------|-----------------------------------------------------------------------------------------------|
| oLC3969 | CaHSP104d Ext R (+3166 bp) | CAGCACCAGAATATTTCTAC                                                                          |
| oLC782  | Hsp104+1409-F              | CTAGTCATGAACAATTGACTGC                                                                        |
| oLC785  | Hsp104+1813-R              | GTTGGTTAGGATTAGCCAAACC                                                                        |
| oLC4197 | CaSGT2-pLC49 F             | AATTTTCCAAATCCATAGACAACACGTTTCCAAAACACTTTTCCCCACATCAACTAAC<br>CCATATTTCTGGGAAACAGCTATGACCATG  |
| oLC4198 | CaSGT2-pLC49 R             | CACAGATGAAAGAAAGCTATATAACAAATCAAACAAAAAAAAGTACTTCAATTACC<br>CTGTTCTAATTAAAGTAAAACGACGGCCAG    |
| oLC4199 | CaSGT2d Ext F (-355 bp)    | GCAGCACTGAATTATCAAAG                                                                          |
| oLC4200 | CaSGT2d Ext R (+1460 bp)   | CACCTCCCATATTTTATACG                                                                          |
| oLC4201 | CaSGT2d Int F (+187 bp)    | GAAAGTCGTTGTCAGAATTG                                                                          |
| oLC4202 | CaSGT2d Int R (+615 bp)    | CGCATCTGATTTAGTTTCTC                                                                          |
| oLC4270 | CaSIS1-pLC49 F             | GTTTTCATTTTCATAACCCTAAAAGAGTCAATTGATTTTAATTTAATATCAAAAATAG<br>AATAATTGCATAGGAAACAGCTATGACCATG |
| oLC4271 | CaSIS1-pLC49 R             | ATTAATAAATTACTAATAATGATATTATCGTATGCATTATTCTCTACTCCTATACTTA<br>TTATAACAATATGTAAAACGACGGCCAG    |
| oLC4272 | CaSIS1d Ext F (-271 bp)    | CTTCTGGTGAATTCTACTTC                                                                          |
| oLC4273 | CaSIS1d Ext R (+1624 bp)   | GGATGGGAGTTTTGTAAATG                                                                          |
| oLC4378 | CaSIS1 +391F               | GATCACGGATTCACATATAG                                                                          |
| oLC4379 | CaSIS1 +663R               | CTTTGTTCCCTGATTTCCAAC                                                                         |
| oLC1620 | Hsp104+1402-F              | CGAGCTAGTCATGAACAATTG                                                                         |
| oLC1621 | Hsp104+1660-R              | GGATACCAGTCAATCTAGCA                                                                          |
| oLC756  | HSP90+1051-F               | GCTGAAGAGTTGATTCCAGAAT                                                                        |
| oLC757  | HSP90+1236-R               | GGAGAAAGCAGTGTAGAATTGG                                                                        |
| oLC2285 | CaACT1+855-F               | GACCTTGAGATACCCAATTG                                                                          |
| oLC2286 | CaACT1+1076-R              | CAGCTTGAATGGAAACGTAG                                                                          |
